# Supplementary material
Source: publisher figshare collection journal article supplement (https://karger.figshare.com/ndownloader/files/25818620)
Supplement: Supplementary file 1 [file 25818620]

**Table S6**. Prevalence of non-LTP molecular allergens included in the microarray

| **Allergen** | **Latin name** | **Prevalence, %** |
| --- | --- | --- |
| Ole e 1 | *Olea europaea* | 51.1 |
| Sal k 1 | *Salsola kali* | 37.5 |
| Cup a 1 | *Cupressus arizonica* | 36.8 |
| Phl p 1 | *Phleum pratense* | 33.0 |
| Der p 2 | *Dermatophagoides pteronyssinus* | 32.8 |
| Der f 2 | *Dermatophagoides farinae* | 32.0 |
| Cyn d 1 | *Cynodon dactylon* | 29.2 |
| Cry j 1 | *Cryptomeria japonica* | 26.1 |
| Der p 1 | *Dermatophagoides pteronyssinus* | 23.8 |
